# Supplementary material for: Comparative Genomics Reveals Thermal Adaptation and a High Metabolic Diversity in “Candidatus Bathyarchaeia”
Source: PubMed Central journal article supplement (PMC8407382; doi:10.1128/msystems.00252-21), 2021-07-20

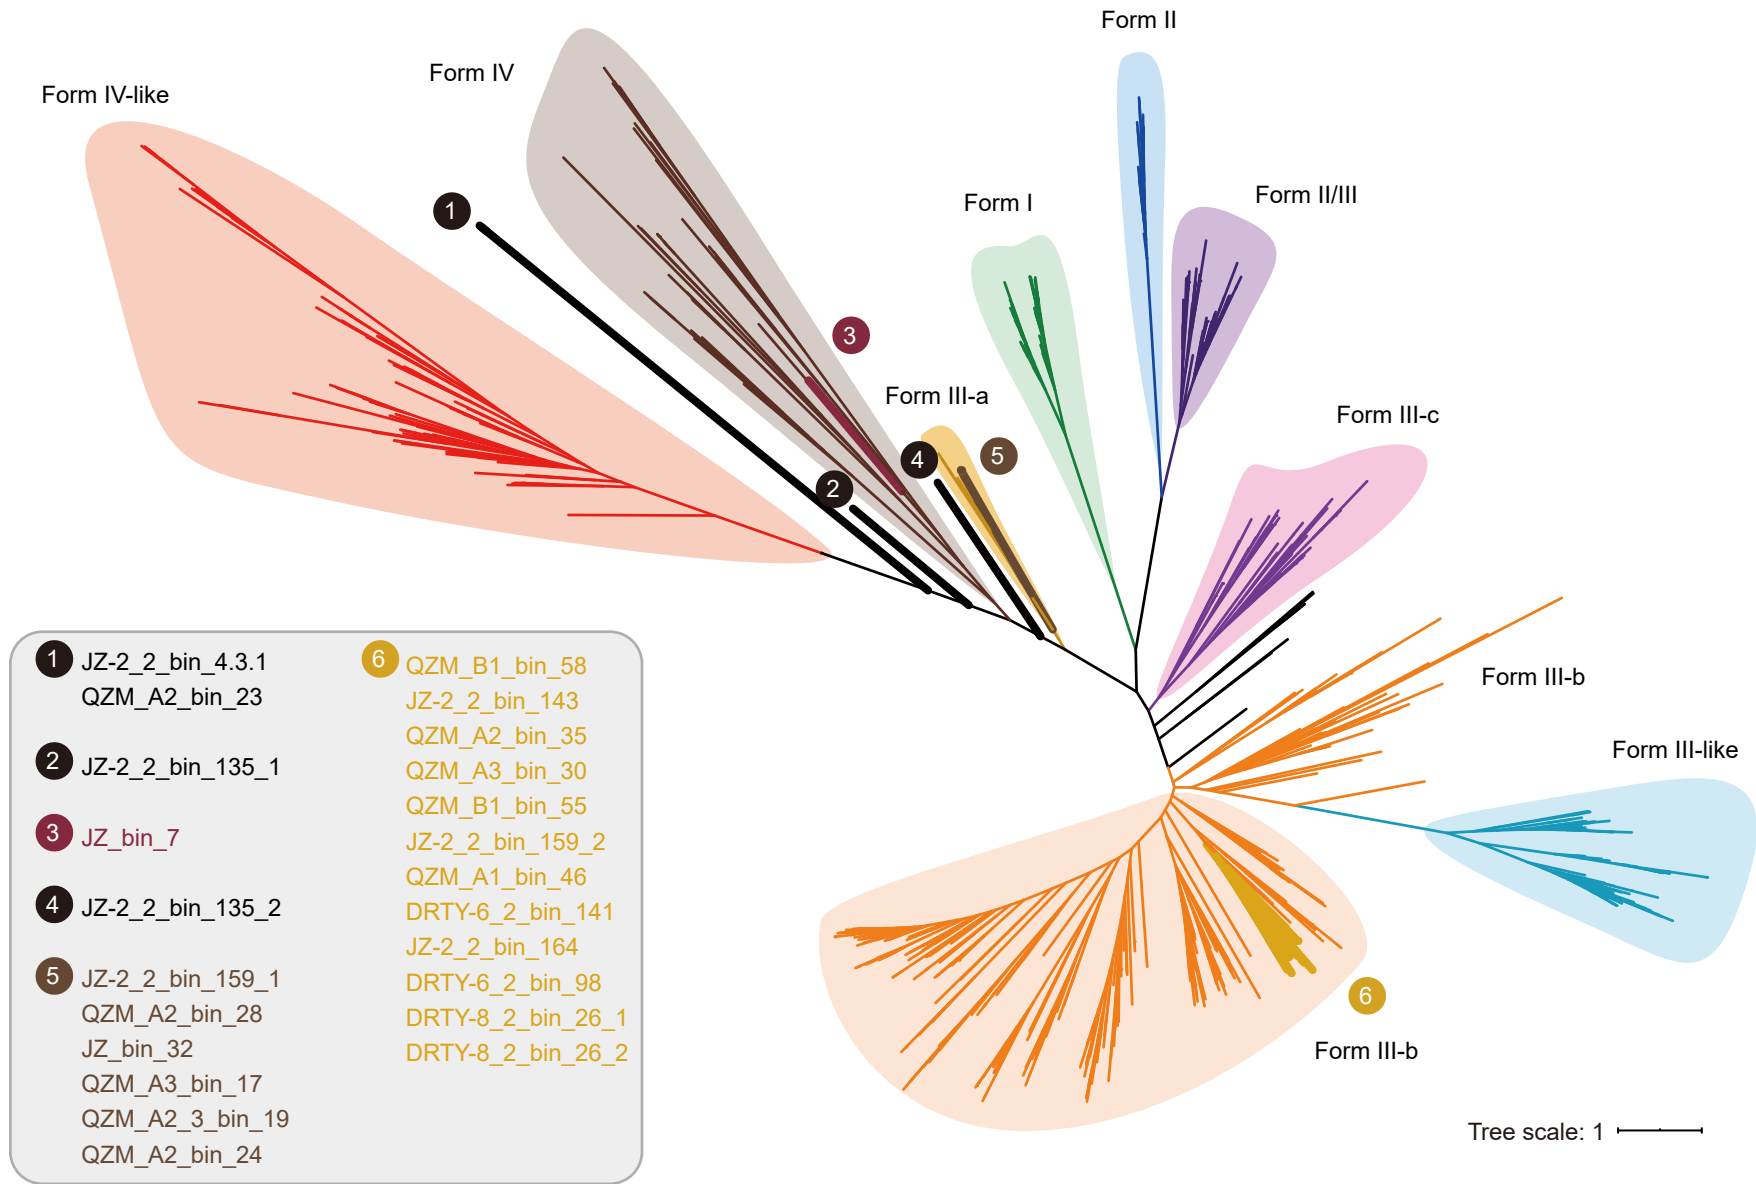

Supplement: msystems.00252-21-sf002.pdf [file msystems.00252-21-sf002.pdf]
