# Supplementary material for: Comparative Genomics Reveals Thermal Adaptation and a High Metabolic Diversity in “Candidatus Bathyarchaeia”
Source: PubMed Central journal article supplement (PMC8407382; doi:10.1128/msystems.00252-21), 2021-07-20

**Non-thermal environment**

**Thermal environment**

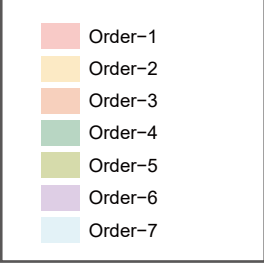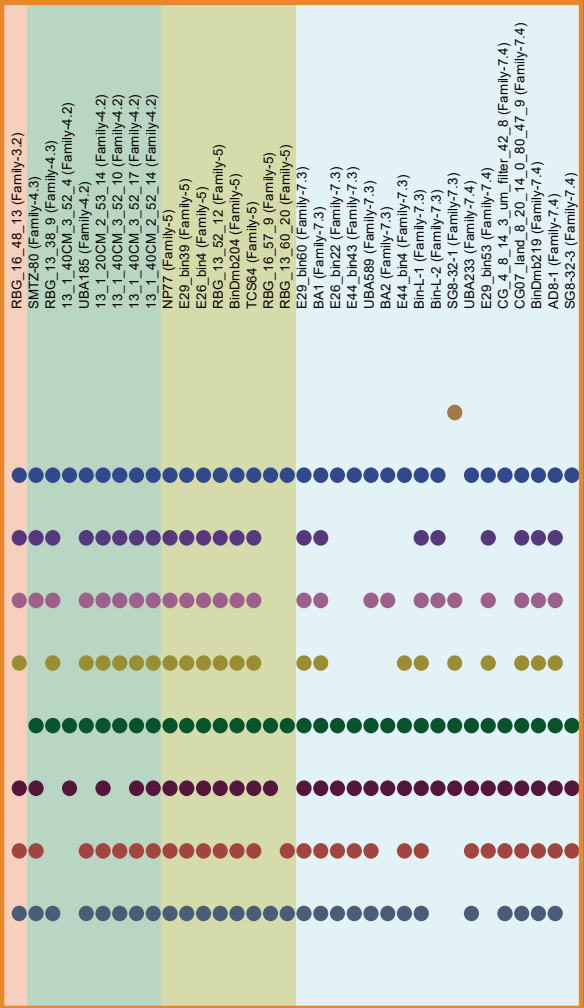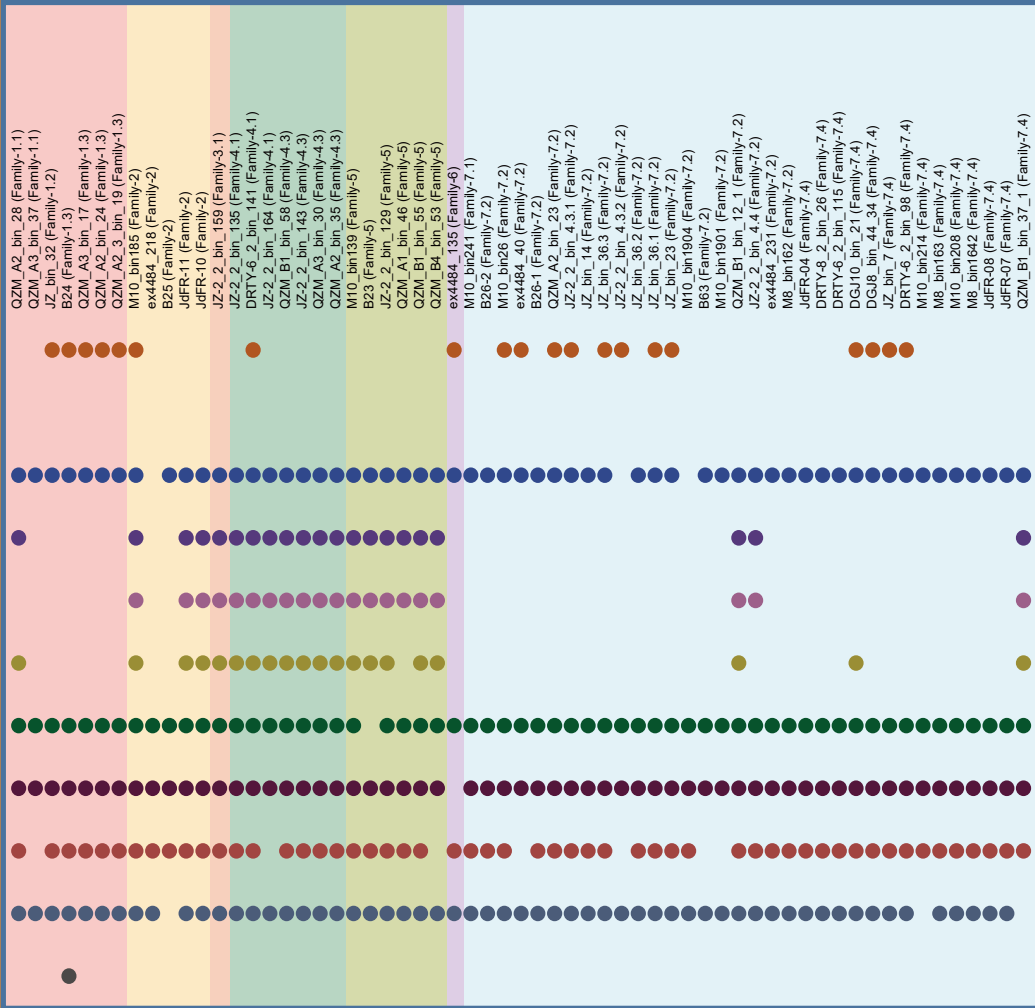

Reverse gyrase, rgy

Recombination protein RecA

Myo-inositol-1-phosphate synthase, INO1

Molecular chaperone GrpE

Molecular chaperone DnaK

Molecular chaperone DnaJ

HSP20 family protein, HSP20

Heat shock protein HtpX

DNA repair protein RadB

DNA repair protein Rada

DNA repair protein RAD51

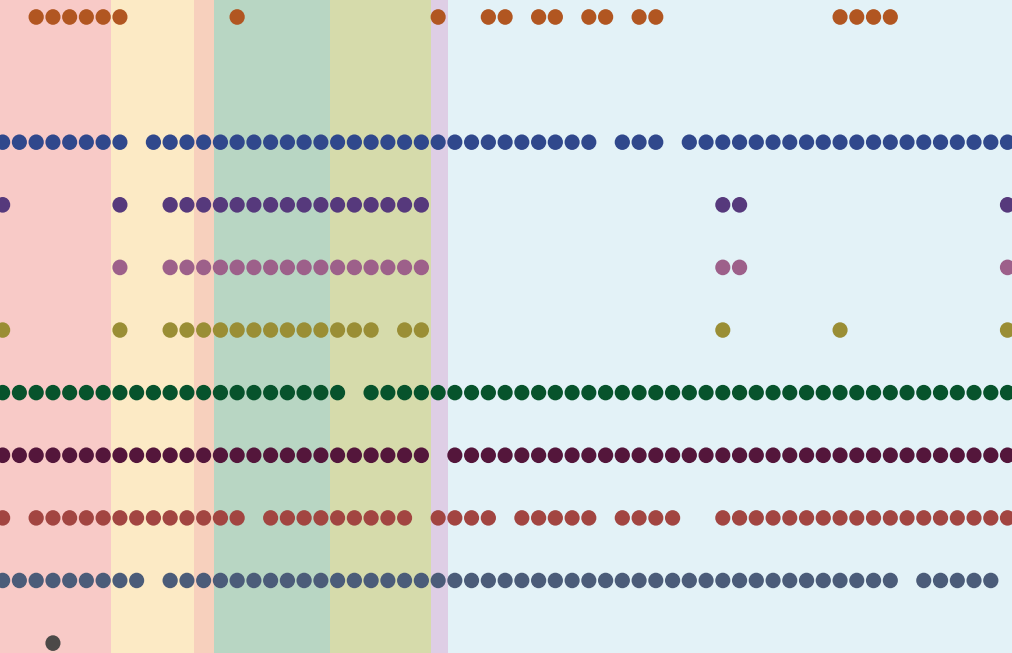

Supplement: msystems.00252-21-sf003.pdf [file msystems.00252-21-sf003.pdf]
