# Supplementary material for: Comparative Genomics Reveals Thermal Adaptation and a High Metabolic Diversity in “Candidatus Bathyarchaeia”
Source: PubMed Central journal article supplement (PMC8407382; doi:10.1128/msystems.00252-21), 2021-07-20

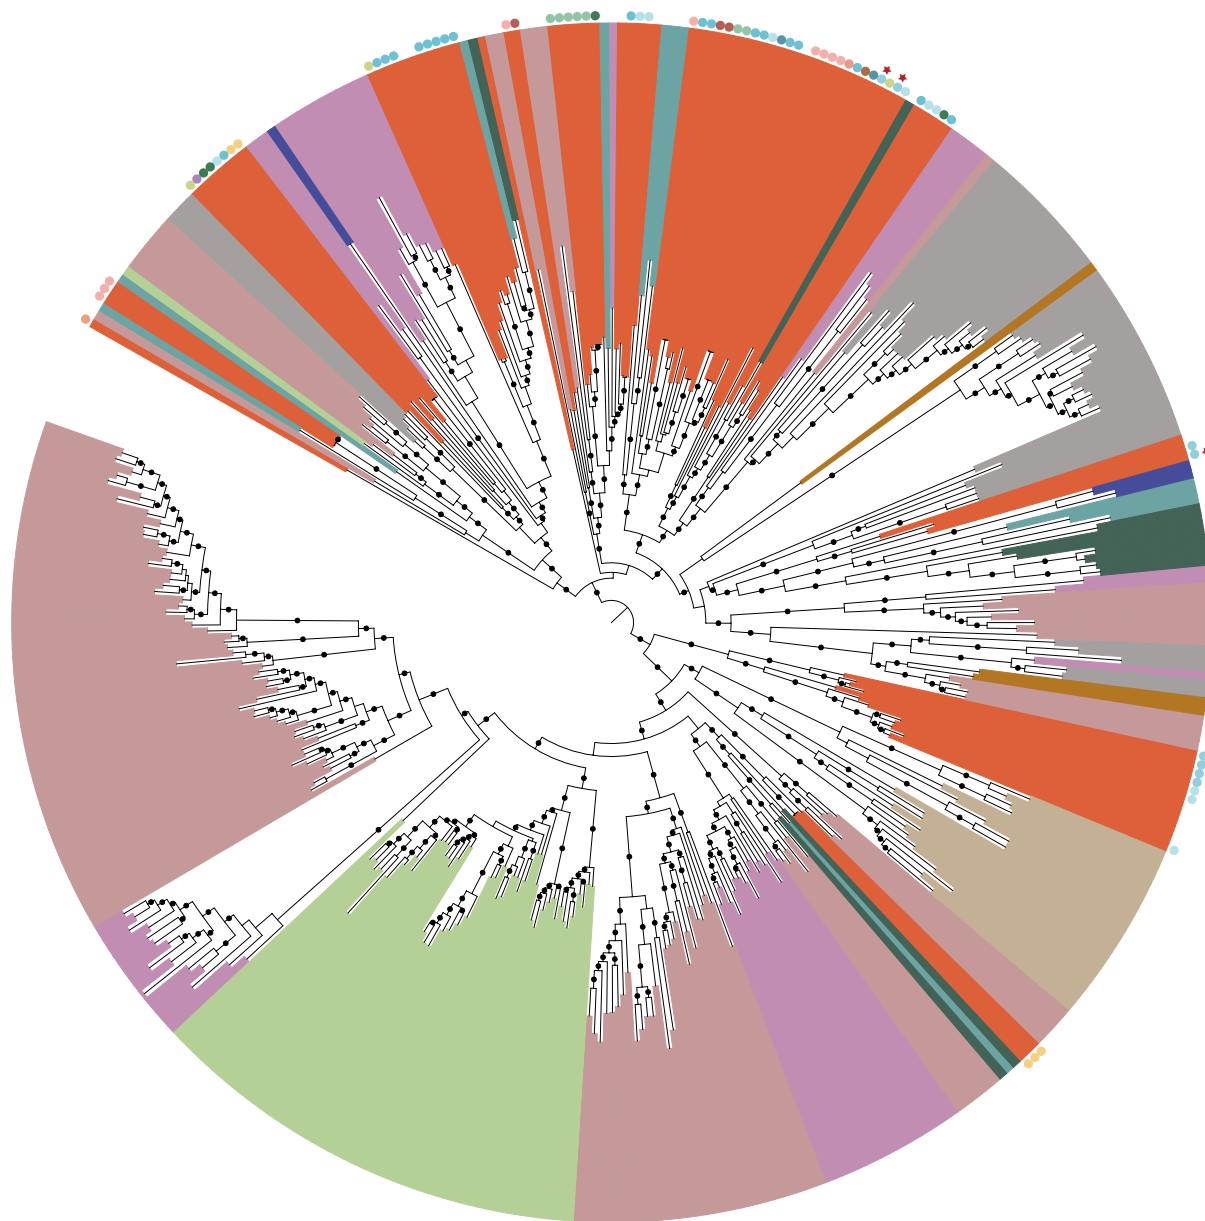

- Asgardarchaeota
  - Halobacteriota
  - Hydrothermarchaeota
  - Methanobacteriota
  - Thermoplasmatota
  - Bacteria
- 
- Thermoproteota
- Bathyarchaeia
  - Korarchaeia
  - Methanomethylia
  - Thermoproteia

Lineage of Bathyarchaeia

- Family-1.1
  - Family-1.2
  - Family-1.3
  - Family-2
  - Family-3.1
  - Family-3.2
  - Family-4.1
  - Family-4.3
  - Family-5
  - Family-6
  - Family-7.1
  - Family-7.2
  - Family-7.3
  - Family-7.4
- ★ Genome BA1 contains methane metabolism

Support values > 70%: ●

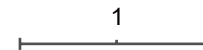

Supplement: msystems.00252-21-sf005.pdf [file msystems.00252-21-sf005.pdf]
