# Supplementary material for: Comparative Genomics Reveals Thermal Adaptation and a High Metabolic Diversity in “Candidatus Bathyarchaeia”
Source: PubMed Central journal article supplement (PMC8407382; doi:10.1128/msystems.00252-21), 2021-07-20
Supplement: msystems.00252-21-st001.pdf [file msystems.00252-21-st001.pdf]

Supplementary Table 1. Overview of 35 *Ca.* Bathyarchaea MAGs from hot springs.

| Order   | Family     | Genome bins      | No. of scaffolds | Genome size (Mb) | GC content (%) | N50 value (bp) | Relative abundance of genome bins (%) | No. of protein coding genes | Coding density (%) | No. of genes annotated by KO | No. of genes annotated by COG | No. of genes annotated by arCOG | No. of genes annotated by pfam | Completeness <sup>‡</sup> | Contamination <sup>‡</sup> | Heterogeneity <sup>‡</sup> |
|---------|------------|------------------|------------------|------------------|----------------|----------------|---------------------------------------|-----------------------------|--------------------|------------------------------|-------------------------------|---------------------------------|--------------------------------|---------------------------|----------------------------|----------------------------|
| Order-1 | Family-1.1 | QZM_A2_bin_28    | 143              | 1.67             | 47.28          | 14757          | 0.44                                  | 1724                        | 79.9               | 814(47.2%)                   | 1165(67.6%)                   | 1182(68.6%)                     | 1199(69.5%)                    | 85.60                     | 1.94                       | 0                          |
|         |            | QZM_A3_bin_37    | 181              | 1.11             | 46.70          | 6560           | 0.23                                  | 1184                        | 76.8               | 572(48.3%)                   | 805(68.0%)                    | 809(68.3%)                      | 824(69.6%)                     | 68.59                     | 1.25                       | 0                          |
|         | Family-1.2 | JZ_bin_32        | 14               | 1.41             | 41.04          | 176051         | 0.71                                  | 1442                        | 91.0               | 816(56.6%)                   | 1085(75.2%)                   | 1095(75.9%)                     | 1130(78.4%)                    | 93.93                     | 0.93                       | 0                          |
|         | Family-1.3 | QZM_A2_3_bin_19  | 194              | 1.30             | 40.61          | 7558           | 0.58                                  | 1526                        | 85.0               | 680(44.6%)                   | 996(65.3%)                    | 991(64.9%)                      | 1024(67.1%)                    | 74.68                     | 0.97                       | 0                          |
|         |            | QZM_A2_bin_24    | 74               | 1.98             | 41.39          | 72377          | 1.91                                  | 2113                        | 86.8               | 930(44.0%)                   | 1399(66.2%)                   | 1416(67.0%)                     | 1491(70.6%)                    | 98.06                     | 2.43                       | 0                          |
|         |            | QZM_A3_bin_17    | 129              | 1.90             | 41.30          | 24870          | 0.62                                  | 2085                        | 86.1               | 903(43.3%)                   | 1350(64.7%)                   | 1365(65.5%)                     | 1419(68.1%)                    | 88.50                     | 0                          | 0                          |
| Order-3 | Family-3.1 | JZ-2_2_bin_159   | 30               | 1.39             | 42.81          | 88026          | 0.06                                  | 1496                        | 87.7               | 814(54.4%)                   | 1105(73.9%)                   | 1133(75.7%)                     | 1170(78.2%)                    | 98.13                     | 0.47                       | 0                          |
| Order-4 | Family-4.1 | DRTY-6_2_bin_141 | 12               | 1.49             | 30.94          | 354801         | 0.08                                  | 1564                        | 88.0               | 854(54.6%)                   | 1171(74.9%)                   | 1206(77.1%)                     | 1215(77.7%)                    | 98.13                     | 0.93                       | 0                          |
|         |            | JZ-2_2_bin_135   | 32               | 1.75             | 52.83          | 119633         | 0.11                                  | 1826                        | 84.6               | 919(50.3%)                   | 1302(71.3%)                   | 1343(73.5%)                     | 1391(76.2%)                    | 96.26                     | 0.93                       | 0                          |
|         |            | JZ-2_2_bin_164   | 24               | 1.33             | 32.45          | 90957          | 0.08                                  | 1439                        | 88.8               | 811(56.4%)                   | 1085(75.4%)                   | 1133(78.7%)                     | 1128(78.4%)                    | 97.20                     | 0                          | 0                          |
|         | Family-4.3 | JZ-2_2_bin_143   | 42               | 1.63             | 45.49          | 48958          | 0.06                                  | 1806                        | 87.7               | 911(50.4%)                   | 1287(71.3%)                   | 1329(73.6%)                     | 1368(75.7%)                    | 97.20                     | 0                          | 0                          |
|         |            | QZM_A2_bin_35    | 132              | 1.57             | 45.89          | 16787          | 0.35                                  | 1872                        | 86.4               | 869(46.4%)                   | 1246(66.6%)                   | 1302(69.6%)                     | 1307(69.8%)                    | 81.55                     | 0                          | 0                          |
|         |            | QZM_A3_bin_30    | 187              | 1.31             | 45.39          | 7962           | 0.27                                  | 1610                        | 83.9               | 726(45.1%)                   | 1036(64.3%)                   | 1072(66.6%)                     | 1078(67.0%)                    | 69.54                     | 0                          | 0                          |
|         |            | QZM_B1_bin_58    | 156              | 1.70             | 51.81          | 15081          | 0.33                                  | 1991                        | 84.7               | 878(44.1%)                   | 1245(62.5%)                   | 1263(63.4%)                     | 1338(67.2%)                    | 75.24                     | 0.97                       | 0                          |
| Order-5 | Family-5   | JZ-2_2_bin_129   | 43               | 1.83             | 50.84          | 99040          | 0.33                                  | 2000                        | 85.8               | 901(45.1%)                   | 1343(67.2%)                   | 1375(68.8%)                     | 1419(71.0%)                    | 94.86                     | 0                          | 0                          |
|         |            | QZM_A1_bin_46    | 162              | 1.42             | 52.05          | 11161          | 0.27                                  | 1625                        | 84.1               | 761(46.8%)                   | 1110(68.3%)                   | 1129(69.5%)                     | 1161(71.4%)                    | 62.56                     | 0                          | 0                          |
|         |            | QZM_B1_bin_55    | 91               | 1.90             | 43.28          | 51168          | 0.65                                  | 2117                        | 86.6               | 1014(47.9%)                  | 1442(68.1%)                   | 1445(68.3%)                     | 1508(71.2%)                    | 92.99                     | 0.93                       | 0                          |
|         |            | QZM_B4_bin_53    | 122              | 1.32             | 43.16          | 15217          | 0.30                                  | 1517                        | 87.2               | 776(51.2%)                   | 1081(71.3%)                   | 1086(71.6%)                     | 1142(75.3%)                    | 82.24                     | 0.93                       | 0                          |
| Order-7 | Family-7.2 | JZ_bin_14        | 75               | 1.10             | 45.89          | 24211          | 1.97                                  | 1197                        | 91.1               | 695(58.1%)                   | 928(77.5%)                    | 941(78.6%)                      | 965(80.6%)                     | 88.32                     | 0.93                       | 0                          |
|         |            | JZ_bin_23        | 42               | 1.46             | 43.61          | 78088          | 1.80                                  | 1558                        | 89.8               | 878(56.4%)                   | 1215(78.0%)                   | 1241(79.7%)                     | 1225(78.6%)                    | 99.07                     | 4.21                       | 0                          |
|         |            | JZ_bin_36.1      | 108              | 1.49             | 42.65          | 20585          | 0.54                                  | 1584                        | 89.6               | 848(53.5%)                   | 1185(74.8%)                   | 1216(76.8%)                     | 1200(75.8%)                    | 95.79                     | 2.80                       | 0                          |
|         |            | JZ_bin_36.2      | 35               | 1.45             | 44.45          | 89595          | 0.80                                  | 1503                        | 90.9               | 835(55.6%)                   | 1168(77.7%)                   | 1180(78.5%)                     | 1220(81.2%)                    | 98.13                     | 4.67                       | 0                          |
|         |            | JZ_bin_36.3      | 48               | 1.32             | 43.44          | 38869          | 0.85                                  | 1388                        | 90.5               | 753(54.3%)                   | 1040(74.9%)                   | 1055(76.0%)                     | 1062(76.5%)                    | 93.46                     | 1.87                       | 0                          |
|         |            | JZ-2_2_bin_4.3.1 | 91               | 1.39             | 42.76          | 21007          | 0.06                                  | 1470                        | 88.6               | 758(51.6%)                   | 1093(74.4%)                   | 1082(73.6%)                     | 1123(76.4%)                    | 89.32                     | 0.97                       | 0                          |
|         |            | JZ-2_2_bin_4.3.2 | 262              | 1.57             | 41.23          | 6926           | 0.05                                  | 1834                        | 87.7               | 835(45.5%)                   | 1228(67.0%)                   | 1235(67.3%)                     | 1290(70.3%)                    | 74.45                     | 0.31                       | 0                          |
|         |            | JZ-2_2_bin_4.4   | 46               | 1.20             | 41.41          | 52385          | 0.10                                  | 1252                        | 87.4               | 619(49.4%)                   | 875(69.9%)                    | 875(69.9%)                      | 945(75.5%)                     | 78.43                     | 0                          | 0                          |
|         | Family-7.4 | QZM_A2_bin_23    | 120              | 1.74             | 42.81          | 20498          | 0.50                                  | 1907                        | 86.4               | 893(46.8%)                   | 1295(67.9%)                   | 1312(68.8%)                     | 1354(71.0%)                    | 91.92                     | 0.97                       | 0                          |
|         |            | QZM_B1_bin_12_1  | 92               | 1.41             | 42.29          | 19348          | 0.32                                  | 1533                        | 87.5               | 707(46.1%)                   | 1021(66.6%)                   | 1030(67.2%)                     | 1081(70.5%)                    | 87.85                     | 0                          | 0                          |
|         |            | DGJ10_bin_21     | 358              | 1.26             | 43.35          | 4821           | 0.07                                  | 1653                        | 86.0               | 818(49.5%)                   | 1084(65.6%)                   | 1109(67.1%)                     | 1102(66.7%)                    | 75.40                     | 0                          | 0                          |
|         |            | DGJ8_bin_44_34   | 83               | 1.37             | 43.93          | 21477          | 1.01                                  | 1639                        | 87.7               | 806(49.2%)                   | 1088(66.4%)                   | 1116(68.1%)                     | 1122(68.5%)                    | 83.18                     | 1.87                       | 0                          |
|         |            | DRTY-6_2_bin_115 | 15               | 1.31             | 42.86          | 187909         | 0.20                                  | 1441                        | 91.6               | 704(48.9%)                   | 1000(69.4%)                   | 1008(70.0%)                     | 1042(72.3%)                    | 88.79                     | 1.87                       | 0                          |
|         |            | DRTY-6_2_bin_98  | 9                | 1.71             | 43.23          | 240134         | 0.15                                  | 1837                        | 90.2               | 918(50.0%)                   | 1292(70.3%)                   | 1332(72.5%)                     | 1349(73.4%)                    | 99.07                     | 2.80                       | 0                          |
|         |            | DRTY-8_2_bin_26  | 155              | 1.08             | 41.57          | 8502           | 0.03                                  | 1331                        | 89.7               | 769(57.8%)                   | 991(74.5%)                    | 1024(76.9%)                     | 1001(75.2%)                    | 87.85                     | 1.87                       | 0                          |
|         |            | JZ_bin_7         | 41               | 1.24             | 45.89          | 37224          | 3.09                                  | 1394                        | 92.6               | 767(55.0%)                   | 1034(74.2%)                   | 1047(75.1%)                     | 1071(76.8%)                    | 94.93                     | 0.93                       | 0                          |
|         |            | QZM_B1_bin_37_1  | 126              | 1.64             | 45.01          | 21240          | 0.32                                  | 1929                        | 88.9               | 810(42.0%)                   | 1154(59.8%)                   | 1189(61.6%)                     | 1257(65.2%)                    | 90.20                     | 0.93                       | 0                          |

‡ Completeness, contamination and heterogeneity are estimated by CheckM (Parks et al., 2015).
